# Supplementary material
Source: publisher figshare collection journal article supplement (https://acs.figshare.com/ndownloader/files/4773394)
Supplement: Supplementary file 1 [file 4773394]

 
data_kkln32m 
 
_audit_creation_method            SHELXL-97 
_chemical_name_systematic 
; 
 ? 
; 
_chemical_name_common             ? 
_chemical_melting_point           ? 
_chemical_formula_moiety          ? 
_chemical_formula_sum 
 'C21 H17 N1.33' 
_chemical_formula_weight          288.03 
 
loop_ 
 _atom_type_symbol 
 _atom_type_description 
 _atom_type_scat_dispersion_real 
 _atom_type_scat_dispersion_imag 
 _atom_type_scat_source 
 'C'  'C'   0.0033   0.0016 
 'International Tables Vol C Tables 4.2.6.8 and 6.1.1.4' 
 'N'  'N'   0.0061   0.0033 
 'International Tables Vol C Tables 4.2.6.8 and 6.1.1.4' 
 'H'  'H'   0.0000   0.0000 
 'International Tables Vol C Tables 4.2.6.8 and 6.1.1.4' 
 
_symmetry_cell_setting            'TRIGONAL' 
_symmetry_space_group_name_H-M    'P-31C' 
 
loop_ 
 _symmetry_equiv_pos_as_xyz 
 'x, y, z' 
 '-y, x-y, z' 
 '-x+y, -x, z' 
 '-y, -x, -z+1/2' 
 'x, x-y, -z+1/2' 
 '-x+y, y, -z+1/2' 
 '-x, -y, -z' 
 'y, -x+y, -z' 
 'x-y, x, -z' 
 'y, x, z-1/2' 
 '-x, -x+y, z-1/2' 
 'x-y, -y, z-1/2' 
 
_cell_length_a                    15.2238(12) 
_cell_length_b                    15.2238(12) 
_cell_length_c                    26.683(3) 
_cell_angle_alpha                 90.00 
_cell_angle_beta                  90.00 
_cell_angle_gamma                 120.00 
_cell_volume                      5355.6(8) 
_cell_formula_units_Z             12 
_cell_measurement_temperature     100(2) 
_cell_measurement_reflns_used     ? 
_cell_measurement_theta_min       ? 
_cell_measurement_theta_max       ? 
 
_exptl_crystal_description        PLATE 
_exptl_crystal_colour             YELLOW
_exptl_crystal_size_max           0.33 
_exptl_crystal_size_mid           0.18 
_exptl_crystal_size_min           0.05  
_exptl_crystal_density_meas       ? 
_exptl_crystal_density_diffrn     1.072 
_exptl_crystal_density_method     'not measured' 
_exptl_crystal_F_000              1828 
_exptl_absorpt_coefficient_mu     0.062 
_exptl_absorpt_correction_type    'SADABS' 
_exptl_absorpt_correction_T_min   ? 
_exptl_absorpt_correction_T_max   ? 
_exptl_absorpt_process_details    ? 
 
_exptl_special_details 
; 
 ? 
; 
 
_diffrn_ambient_temperature       100(2) 
_diffrn_radiation_wavelength      0.71073 
_diffrn_radiation_type            MoK\a 
_diffrn_radiation_source          'fine-focus sealed tube' 
_diffrn_radiation_monochromator   graphite 
_diffrn_measurement_device_type   'BRUKER SMART CCD AREA DETECTOR' 
_diffrn_measurement_method        'PHI-OMEGA' 
_diffrn_detector_area_resol_mean  0.3 
_diffrn_standards_number          ? 
_diffrn_standards_interval_count  ? 
_diffrn_standards_interval_time   ? 
_diffrn_standards_decay_%         ? 
_diffrn_reflns_number             20847 
_diffrn_reflns_av_R_equivalents   0.1636 
_diffrn_reflns_av_sigmaI/netI     0.0978 
_diffrn_reflns_limit_h_min        -16 
_diffrn_reflns_limit_h_max        15 
_diffrn_reflns_limit_k_min        -16 
_diffrn_reflns_limit_k_max        16 
_diffrn_reflns_limit_l_min        -28 
_diffrn_reflns_limit_l_max        21 
_diffrn_reflns_theta_min          1.53 
_diffrn_reflns_theta_max          22.50 
_reflns_number_total              2353 
_reflns_number_gt                 1417 
_reflns_threshold_expression      >2sigma(I) 
 
_computing_data_collection        'BRUKER AXS SMART 3'  
_computing_cell_refinement        'BRUKER AXS SMART 3'  
_computing_data_reduction         'BRUKER AXS SAINT'
_computing_structure_solution     'SHELXS-97 (Sheldrick, 1990)' 
_computing_structure_refinement   'SHELXL-97 (Sheldrick, 1997)' 
_computing_molecular_graphics     'PLATON, 'MERCURY 1.4'
_computing_publication_material   ? 
 
_refine_special_details 
; 
 Refinement of F^2^ against ALL reflections.  The weighted R-factor wR and 
 goodness of fit S are based on F^2^, conventional R-factors R are based 
 on F, with F set to zero for negative F^2^. The threshold expression of 
 F^2^ > 2sigma(F^2^) is used only for calculating R-factors(gt) etc. and is 
 not relevant to the choice of reflections for refinement.  R-factors based 
 on F^2^ are statistically about twice as large as those based on F, and R- 
 factors based on ALL data will be even larger. 
; 
 
_refine_ls_structure_factor_coef  Fsqd  
_refine_ls_matrix_type            full 
_refine_ls_weighting_scheme       calc  
_refine_ls_weighting_details 
 'calc w=1/[\s^2^(Fo^2^)+(0.1836P)^2^+1.9091P] where P=(Fo^2^+2Fc^2^)/3' 
_atom_sites_solution_primary      direct 
_atom_sites_solution_secondary    difmap 
_atom_sites_solution_hydrogens    geom 
_refine_ls_hydrogen_treatment     mixed 
_refine_ls_extinction_method      none 
_refine_ls_extinction_coef        ? 
_refine_ls_number_reflns          2353 
_refine_ls_number_parameters      202 
_refine_ls_number_restraints      6 
_refine_ls_R_factor_all           0.1593 
_refine_ls_R_factor_gt            0.1042 
_refine_ls_wR_factor_ref          0.3069 
_refine_ls_wR_factor_gt           0.2738 
_refine_ls_goodness_of_fit_ref    1.031 
_refine_ls_restrained_S_all       1.082 
_refine_ls_shift/su_max           0.003 
_refine_ls_shift/su_mean          0.000 
 
loop_ 
 _atom_site_label 
 _atom_site_type_symbol 
 _atom_site_fract_x 
 _atom_site_fract_y 
 _atom_site_fract_z 
 _atom_site_U_iso_or_equiv 
 _atom_site_adp_type 
 _atom_site_occupancy 
 _atom_site_symmetry_multiplicity 
 _atom_site_calc_flag 
 _atom_site_refinement_flags 
 _atom_site_disorder_assembly 
 _atom_site_disorder_group 
N1 N 0.6667 0.3333 0.3412(5) 0.070(4) Uani 1 3 d SD . . 
C2A C 0.5691(7) 0.2502(7) 0.3681(4) 0.036(3) Uiso 0.62 1 d PD A 1 
C2B C 0.5942(10) 0.2360(9) 0.3120(5) 0.031(4) Uiso 0.38 1 d PD A 2 
C3 C 0.5283(6) 0.1634(7) 0.3428(4) 0.127(6) Uani 1 1 d D . . 
H3A H 0.5806 0.1448 0.3424 0.153 Uiso 1 1 calc R A 1 
H3B H 0.5235 0.1823 0.3086 0.153 Uiso 1 1 calc R A 1 
N4 N 0.4379(4) 0.0716(4) 0.3504(2) 0.0319(14) Uani 1 1 d . A . 
C5 C 0.3458(5) 0.0758(5) 0.3440(2) 0.0315(17) Uani 1 1 d . . . 
H5A H 0.3397 0.1142 0.3714 0.038 Uiso 1 1 calc R A . 
H5B H 0.2882 0.0075 0.3457 0.038 Uiso 1 1 calc R . . 
C6 C 0.3416(4) 0.1235(4) 0.2951(2) 0.0256(15) Uani 1 1 d . A . 
C7 C 0.3414(5) 0.2148(5) 0.2945(2) 0.0334(17) Uani 1 1 d . . . 
H7 H 0.3415 0.2456 0.3246 0.040 Uiso 1 1 calc R A . 
C8 C 0.3411(4) 0.0803(4) 0.2505(2) 0.0295(16) Uani 1 1 d . . . 
H8 H 0.3406 0.0190 0.2500 0.035 Uiso 1 1 calc R A . 
C9 C 0.4346(5) 0.0205(5) 0.3973(2) 0.0310(16) Uani 1 1 d . . . 
H9A H 0.3757 -0.0471 0.3967 0.037 Uiso 1 1 calc R A . 
H9B H 0.4259 0.0572 0.4247 0.037 Uiso 1 1 calc R . . 
C10 C 0.5271(4) 0.0117(4) 0.4074(2) 0.0232(15) Uani 1 1 d . A . 
C11 C 0.5465(5) -0.0526(4) 0.3768(2) 0.0310(17) Uani 1 1 d . . . 
C12 C 0.4771(5) -0.1139(5) 0.3375(3) 0.0400(19) Uani 1 1 d . A . 
H12 H 0.4195 -0.1093 0.3310 0.048 Uiso 1 1 calc R . . 
C13 C 0.4958(6) -0.1782(5) 0.3102(3) 0.0464(19) Uani 1 1 d . . . 
H13 H 0.4497 -0.2183 0.2857 0.056 Uiso 1 1 calc R A . 
C14 C 0.5826(6) -0.1856(5) 0.3179(3) 0.045(2) Uani 1 1 d . A . 
H14 H 0.5941 -0.2293 0.2983 0.054 Uiso 1 1 calc R . . 
C15 C 0.6497(6) -0.1298(5) 0.3536(3) 0.0421(19) Uani 1 1 d . . . 
H15 H 0.7068 -0.1360 0.3587 0.051 Uiso 1 1 calc R A . 
C16 C 0.6345(5) -0.0613(4) 0.3837(2) 0.0306(17) Uani 1 1 d . A . 
C17 C 0.7043(5) -0.0026(5) 0.4210(3) 0.0356(18) Uani 1 1 d . . . 
H17 H 0.7628 -0.0067 0.4252 0.043 Uiso 1 1 calc R A . 
C18 C 0.6882(5) 0.0616(5) 0.4518(3) 0.0347(17) Uani 1 1 d . A . 
C19 C 0.7596(5) 0.1215(5) 0.4900(3) 0.0406(19) Uani 1 1 d . . . 
H19 H 0.8192 0.1194 0.4935 0.049 Uiso 1 1 calc R A . 
C20 C 0.7415(6) 0.1813(5) 0.5211(3) 0.047(2) Uani 1 1 d . A . 
H20 H 0.7888 0.2203 0.5454 0.056 Uiso 1 1 calc R . . 
C21 C 0.6514(5) 0.1837(5) 0.5163(3) 0.0398(18) Uani 1 1 d . . . 
H21 H 0.6384 0.2229 0.5386 0.048 Uiso 1 1 calc R A . 
C22 C 0.5831(5) 0.1311(5) 0.4806(2) 0.0336(17) Uani 1 1 d . A . 
H22 H 0.5246 0.1358 0.4785 0.040 Uiso 1 1 calc R . . 
C23 C 0.5972(5) 0.0684(4) 0.4458(2) 0.0313(17) Uani 1 1 d . . . 
 
loop_ 
 _atom_site_aniso_label 
 _atom_site_aniso_U_11 
 _atom_site_aniso_U_22 
 _atom_site_aniso_U_33 
 _atom_site_aniso_U_23 
 _atom_site_aniso_U_13 
 _atom_site_aniso_U_12 
N1 0.012(3) 0.012(3) 0.188(14) 0.000 0.000 0.0058(15) 
C3 0.034(5) 0.087(7) 0.187(12) 0.097(8) -0.065(6) -0.025(5) 
N4 0.020(3) 0.029(3) 0.038(3) 0.017(3) 0.006(2) 0.006(2) 
C5 0.029(4) 0.033(4) 0.035(4) 0.004(3) 0.007(3) 0.018(3) 
C6 0.016(3) 0.024(3) 0.030(4) -0.004(3) -0.001(3) 0.005(3) 
C7 0.041(4) 0.043(4) 0.034(4) -0.002(3) 0.007(3) 0.034(4) 
C8 0.031(4) 0.016(3) 0.037(4) 0.000(3) -0.007(3) 0.009(3) 
C9 0.033(4) 0.023(3) 0.031(4) 0.004(3) 0.004(3) 0.009(3) 
C10 0.025(3) 0.025(3) 0.016(3) 0.012(3) 0.003(3) 0.010(3) 
C11 0.030(4) 0.015(3) 0.041(4) 0.013(3) 0.005(3) 0.006(3) 
C12 0.032(4) 0.026(4) 0.053(5) 0.000(4) 0.003(4) 0.007(3) 
C13 0.055(5) 0.040(4) 0.046(5) -0.003(4) -0.009(4) 0.026(4) 
C14 0.060(5) 0.035(4) 0.042(5) 0.003(4) 0.001(4) 0.025(4) 
C15 0.057(5) 0.039(4) 0.046(5) 0.008(4) 0.001(4) 0.035(4) 
C16 0.034(4) 0.018(3) 0.038(4) 0.013(3) 0.005(3) 0.012(3) 
C17 0.032(4) 0.035(4) 0.043(4) 0.017(4) -0.001(3) 0.019(3) 
C18 0.035(4) 0.028(4) 0.038(4) 0.013(3) -0.002(3) 0.013(3) 
C19 0.033(4) 0.037(4) 0.049(5) 0.009(4) -0.012(4) 0.015(3) 
C20 0.053(5) 0.040(4) 0.038(5) 0.007(4) -0.006(4) 0.017(4) 
C21 0.051(5) 0.033(4) 0.026(4) 0.002(3) -0.006(4) 0.015(4) 
C22 0.039(4) 0.031(4) 0.027(4) 0.015(3) 0.003(3) 0.014(3) 
C23 0.041(4) 0.023(3) 0.030(4) 0.013(3) 0.006(3) 0.016(3) 
 
_geom_special_details 
; 
 All esds (except the esd in the dihedral angle between two l.s. planes) 
 are estimated using the full covariance matrix.  The cell esds are taken 
 into account individually in the estimation of esds in distances, angles 
 and torsion angles; correlations between esds in cell parameters are only 
 used when they are defined by crystal symmetry.  An approximate (isotropic) 
 treatment of cell esds is used for estimating esds involving l.s. planes. 
; 
 
loop_ 
 _geom_bond_atom_site_label_1 
 _geom_bond_atom_site_label_2 
 _geom_bond_distance 
 _geom_bond_site_symmetry_2 
 _geom_bond_publ_flag 
N1 C2B 1.544(10) 2_655 ? 
N1 C2B 1.544(10) 3_665 ? 
N1 C2B 1.544(10) . ? 
N1 C2A 1.563(9) . ? 
N1 C2A 1.563(9) 3_665 ? 
N1 C2A 1.563(9) 2_655 ? 
C2A C3 1.330(11) . ? 
C2B C3 1.340(12) . ? 
C3 N4 1.401(9) . ? 
N4 C5 1.445(8) . ? 
N4 C9 1.460(8) . ? 
C5 C6 1.509(8) . ? 
C6 C8 1.359(8) . ? 
C6 C7 1.393(8) . ? 
C7 C8 1.389(9) 5 ? 
C8 C7 1.390(9) 5 ? 
C9 C10 1.504(9) . ? 
C10 C11 1.416(8) . ? 
C10 C23 1.418(9) . ? 
C11 C16 1.424(9) . ? 
C11 C12 1.449(9) . ? 
C12 C13 1.361(9) . ? 
C13 C14 1.396(10) . ? 
C14 C15 1.342(9) . ? 
C15 C16 1.423(9) . ? 
C16 C17 1.404(9) . ? 
C17 C18 1.388(9) . ? 
C18 C19 1.437(9) . ? 
C18 C23 1.450(9) . ? 
C19 C20 1.357(10) . ? 
C20 C21 1.397(10) . ? 
C21 C22 1.341(9) . ? 
C22 C23 1.423(9) . ? 
 
loop_ 
 _geom_angle_atom_site_label_1 
 _geom_angle_atom_site_label_2 
 _geom_angle_atom_site_label_3 
 _geom_angle 
 _geom_angle_site_symmetry_1 
 _geom_angle_site_symmetry_3 
 _geom_angle_publ_flag 
C2B N1 C2B 96.8(8) 2_655 3_665 ? 
C2B N1 C2B 96.8(8) 2_655 . ? 
C2B N1 C2B 96.8(8) 3_665 . ? 
C2B N1 C2A 146.8(7) 2_655 . ? 
C2B N1 C2A 109.7(7) 3_665 . ? 
C2B N1 C2A 61.4(7) . . ? 
C2B N1 C2A 109.7(7) 2_655 3_665 ? 
C2B N1 C2A 61.4(7) 3_665 3_665 ? 
C2B N1 C2A 146.8(7) . 3_665 ? 
C2A N1 C2A 100.5(7) . 3_665 ? 
C2B N1 C2A 61.4(7) 2_655 2_655 ? 
C2B N1 C2A 146.8(7) 3_665 2_655 ? 
C2B N1 C2A 109.7(7) . 2_655 ? 
C2A N1 C2A 100.5(7) . 2_655 ? 
C2A N1 C2A 100.5(7) 3_665 2_655 ? 
C3 C2A N1 110.7(7) . . ? 
C3 C2B N1 111.3(9) . . ? 
C2A C3 C2B 73.0(8) . . ? 
C2A C3 N4 130.9(11) . . ? 
C2B C3 N4 150.3(10) . . ? 
C3 N4 C5 115.4(6) . . ? 
C3 N4 C9 114.2(5) . . ? 
C5 N4 C9 110.5(5) . . ? 
N4 C5 C6 113.5(5) . . ? 
C8 C6 C7 118.1(6) . . ? 
C8 C6 C5 121.1(5) . . ? 
C7 C6 C5 120.8(6) . . ? 
C8 C7 C6 121.0(6) 5 . ? 
C6 C8 C7 120.9(6) . 5 ? 
N4 C9 C10 114.7(5) . . ? 
C11 C10 C23 119.0(6) . . ? 
C11 C10 C9 119.1(5) . . ? 
C23 C10 C9 121.9(6) . . ? 
C10 C11 C16 121.4(6) . . ? 
C10 C11 C12 121.7(6) . . ? 
C16 C11 C12 116.8(6) . . ? 
C13 C12 C11 120.2(7) . . ? 
C12 C13 C14 121.7(7) . . ? 
C15 C14 C13 120.4(7) . . ? 
C14 C15 C16 120.9(7) . . ? 
C17 C16 C15 121.3(6) . . ? 
C17 C16 C11 118.7(6) . . ? 
C15 C16 C11 120.0(6) . . ? 
C18 C17 C16 121.6(6) . . ? 
C17 C18 C19 121.6(6) . . ? 
C17 C18 C23 119.8(6) . . ? 
C19 C18 C23 118.6(6) . . ? 
C20 C19 C18 121.2(7) . . ? 
C19 C20 C21 119.5(7) . . ? 
C22 C21 C20 121.8(7) . . ? 
C21 C22 C23 122.2(7) . . ? 
C10 C23 C22 124.0(6) . . ? 
C10 C23 C18 119.4(6) . . ? 
C22 C23 C18 116.5(6) . . ? 
 
_diffrn_measured_fraction_theta_max    1.000 
_diffrn_reflns_theta_full              22.50 
_diffrn_measured_fraction_theta_full   1.000 
_refine_diff_density_max    0.624 
_refine_diff_density_min   -0.478 
_refine_diff_density_rms    0.089 
